# Supplementary material for: Modeling the Potential Distribution Patterns of the Invasive Plant Species Phytolacca americana in China in Response to Climate Change
Source: MDPI journal article supplement (doi:10.3390/plants13081082), 2024-04-12
Supplement: s1 [file s1]

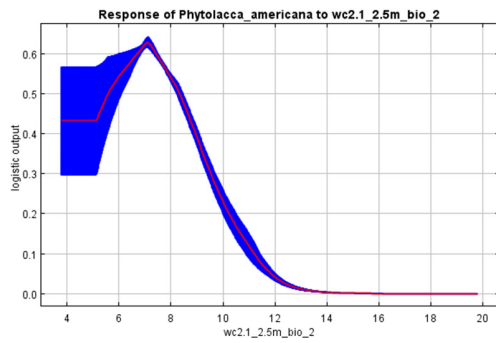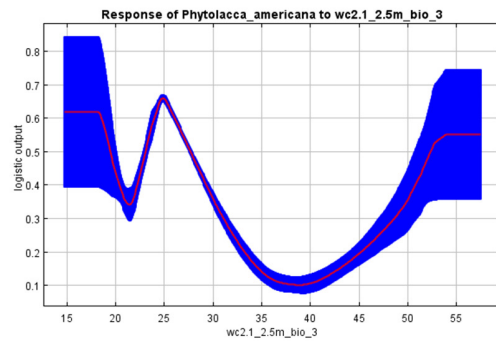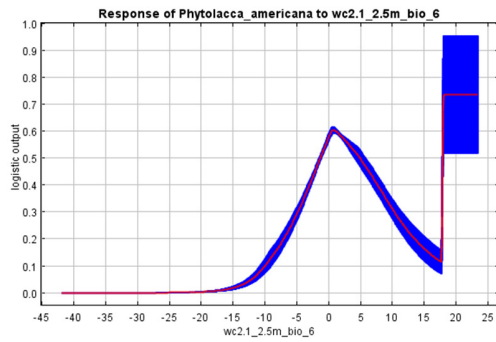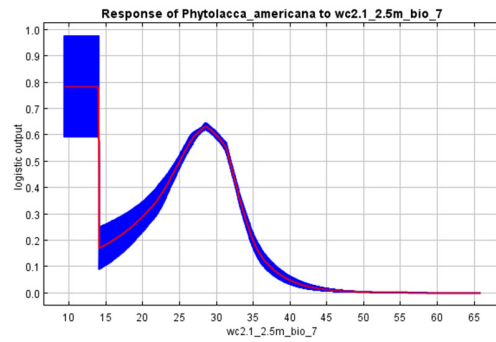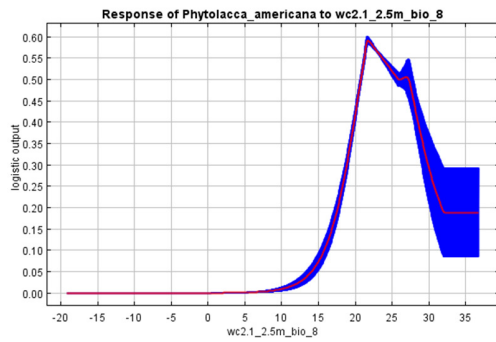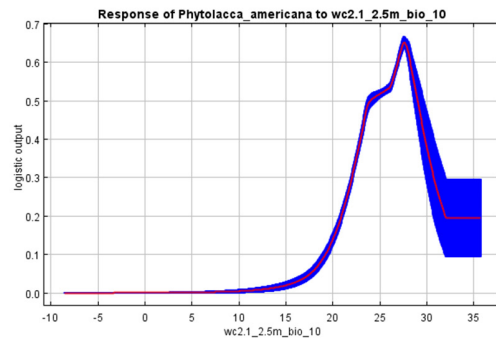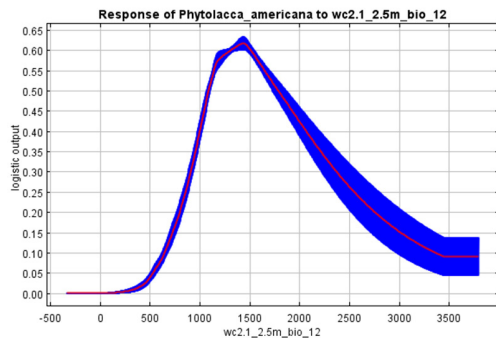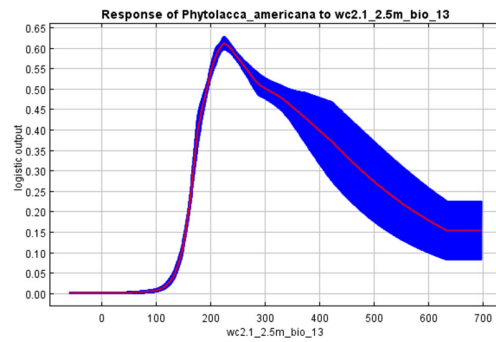

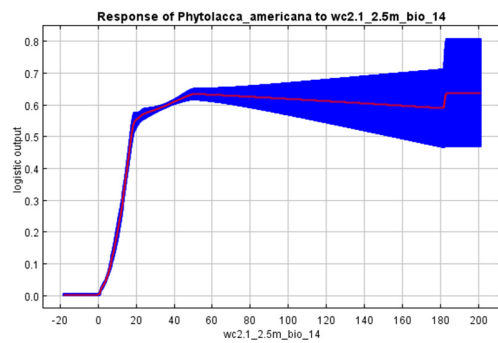

Supplementary Figure S1: Response curve of environmental factors.

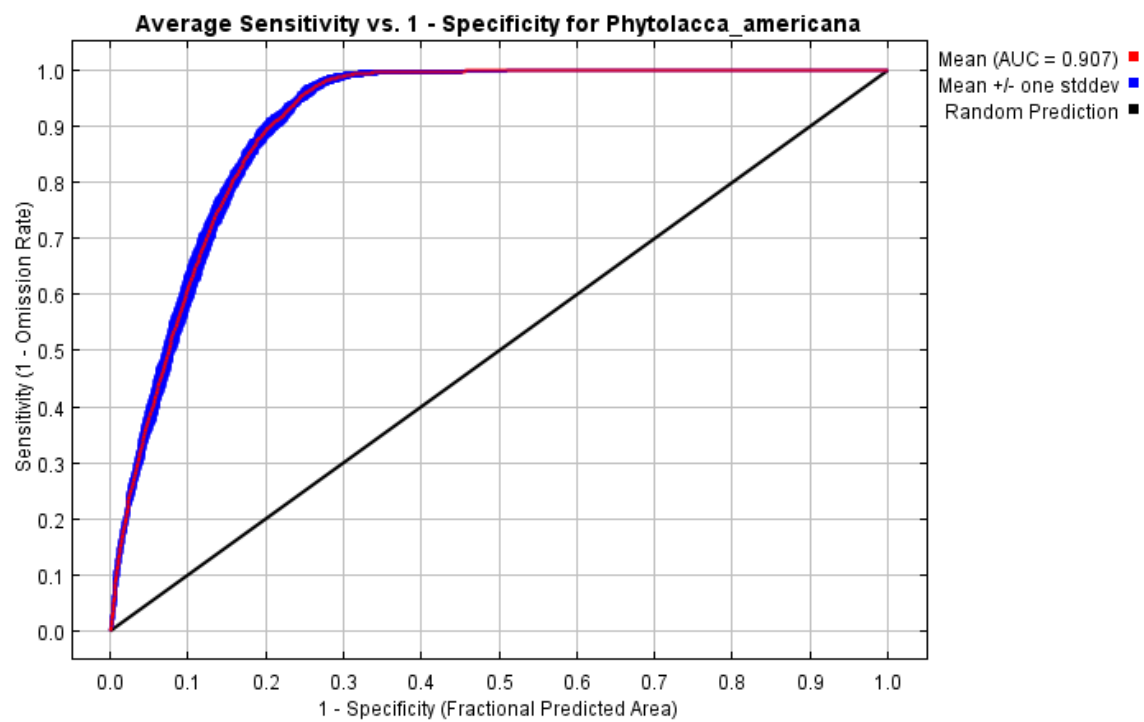

Supplementary Figure S2: Reliability test of the distribution model created for *Phytolacca americana* L.
